# Supplementary material for: Ensemble streamflow prediction considering the influence of reservoirs in Narmada River Basin, India
Source: Copernicus journal article supplement (doi:10.5194/hess-26-6361-2022), 2022-12-16
Supplement: Supplementary file 1 [file hess-26-6361-2022-supplement.pdf]

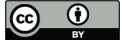

*Supplement of*

## **Ensemble streamflow prediction considering the influence of reservoirs in Narmada River Basin, India**

**Urmin Vegad and Vimal Mishra**

*Correspondence to:* Vimal Mishra (vmishra@iitgn.ac.in)

The copyright of individual parts of the supplement might differ from the article licence.

1

## **Supplemental Information**

2

3 Table. S1 – List of data used with their resolution and sources

| Sr. No. | Type of data                                           | Resolution    | Source                                                                                    |
|---------|--------------------------------------------------------|---------------|-------------------------------------------------------------------------------------------|
| 1       | Precipitation                                          | 0.25° / Daily | Indian Meteorological Department (IMD)<br>(Pai et al., 2014)                              |
| 2       | Temperature                                            | 1.0° / Daily  | Indian Meteorological Department (IMD)<br>(Srivastava et al., 2009)                       |
| 3       | Extended Range Forecast System (ERFS)                  | 1.0° / Daily  | Indian Institute of Tropical Meteorology (IITM)                                           |
| 4       | Global Ensemble Forecast System (GEFS)                 | 0.125° / 3-hr | Indian Institute of Tropical Meteorology (IITM)                                           |
| 5       | Observed streamflow, reservoir water level and storage | Daily         | India – Water Resource Information System (IWRIS)                                         |
| 6       | Digital Elevation Model                                | 30m           | HydroSHEDS<br><a href="http://hydrosheds.cr.usgs.gov/">http://hydrosheds.cr.usgs.gov/</a> |

4

5

6 Table. S2 – The calibrating soil parameters of the VIC-Res model

| Sr. No. | Parameter                  | Range    |
|---------|----------------------------|----------|
| 1       | Ds                         | 0 to 1   |
| 2       | DS <sub>max</sub>          | 0 to 30  |
| 3       | W <sub>s</sub>             | 0 to 1   |
| 4       | B <sub>inf</sub>           | 0 to 0.5 |
| 5       | Soil Depth (d1, d2 and d3) | 0 to 1.5 |

7

8

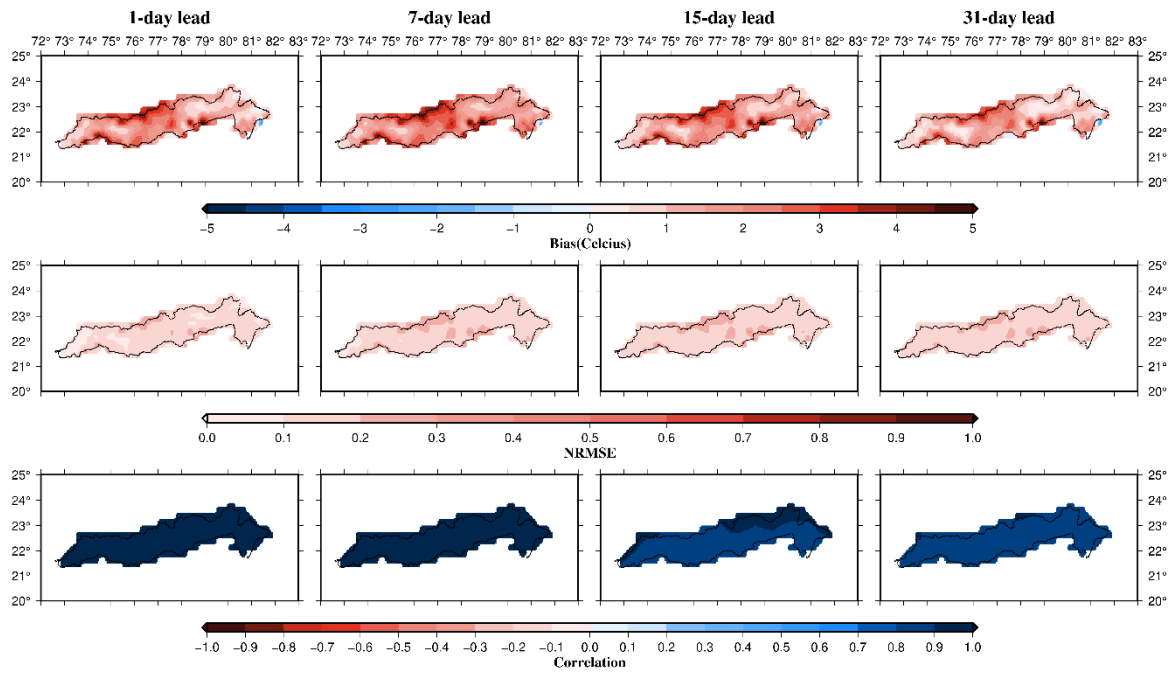

9

10 Fig. S1 - Evaluation of ERF5 meteorological forecast minimum temperature data for  
11 period of 2003-2018. The median of all members' skill at a grid is represented.

12

13

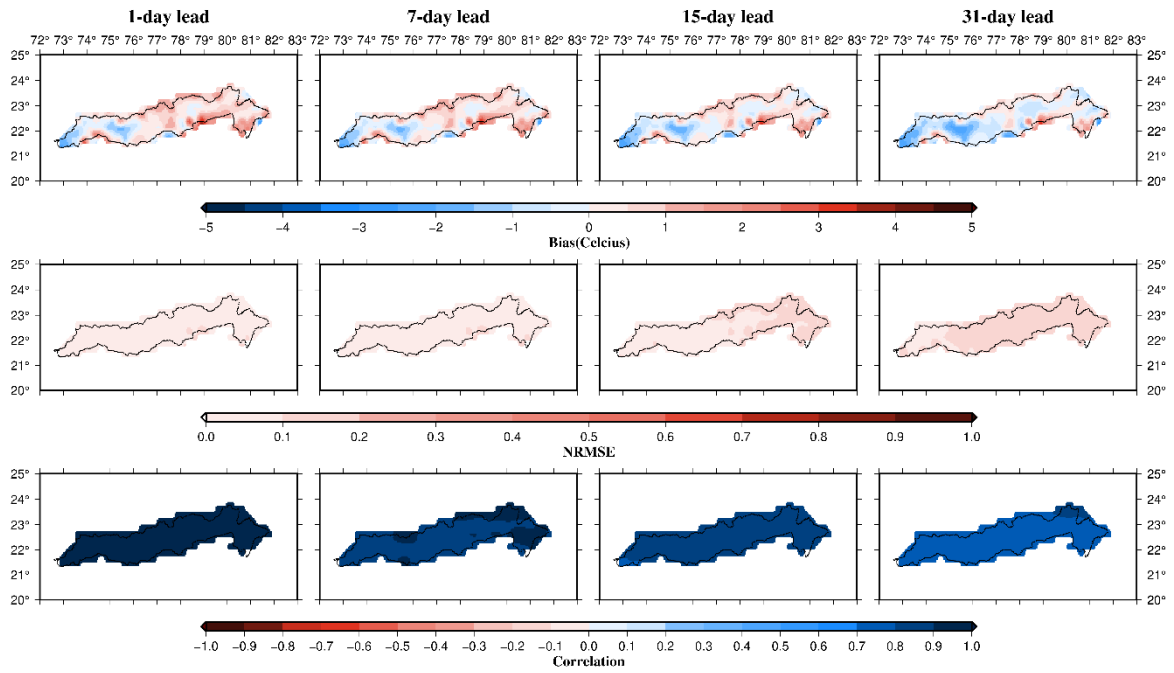

14

15 Fig. S2 - Evaluation of ERFs meteorological forecast maximum temperature data for  
16 period of 2003-2018. The median of all members' skill at a grid is represented.

17

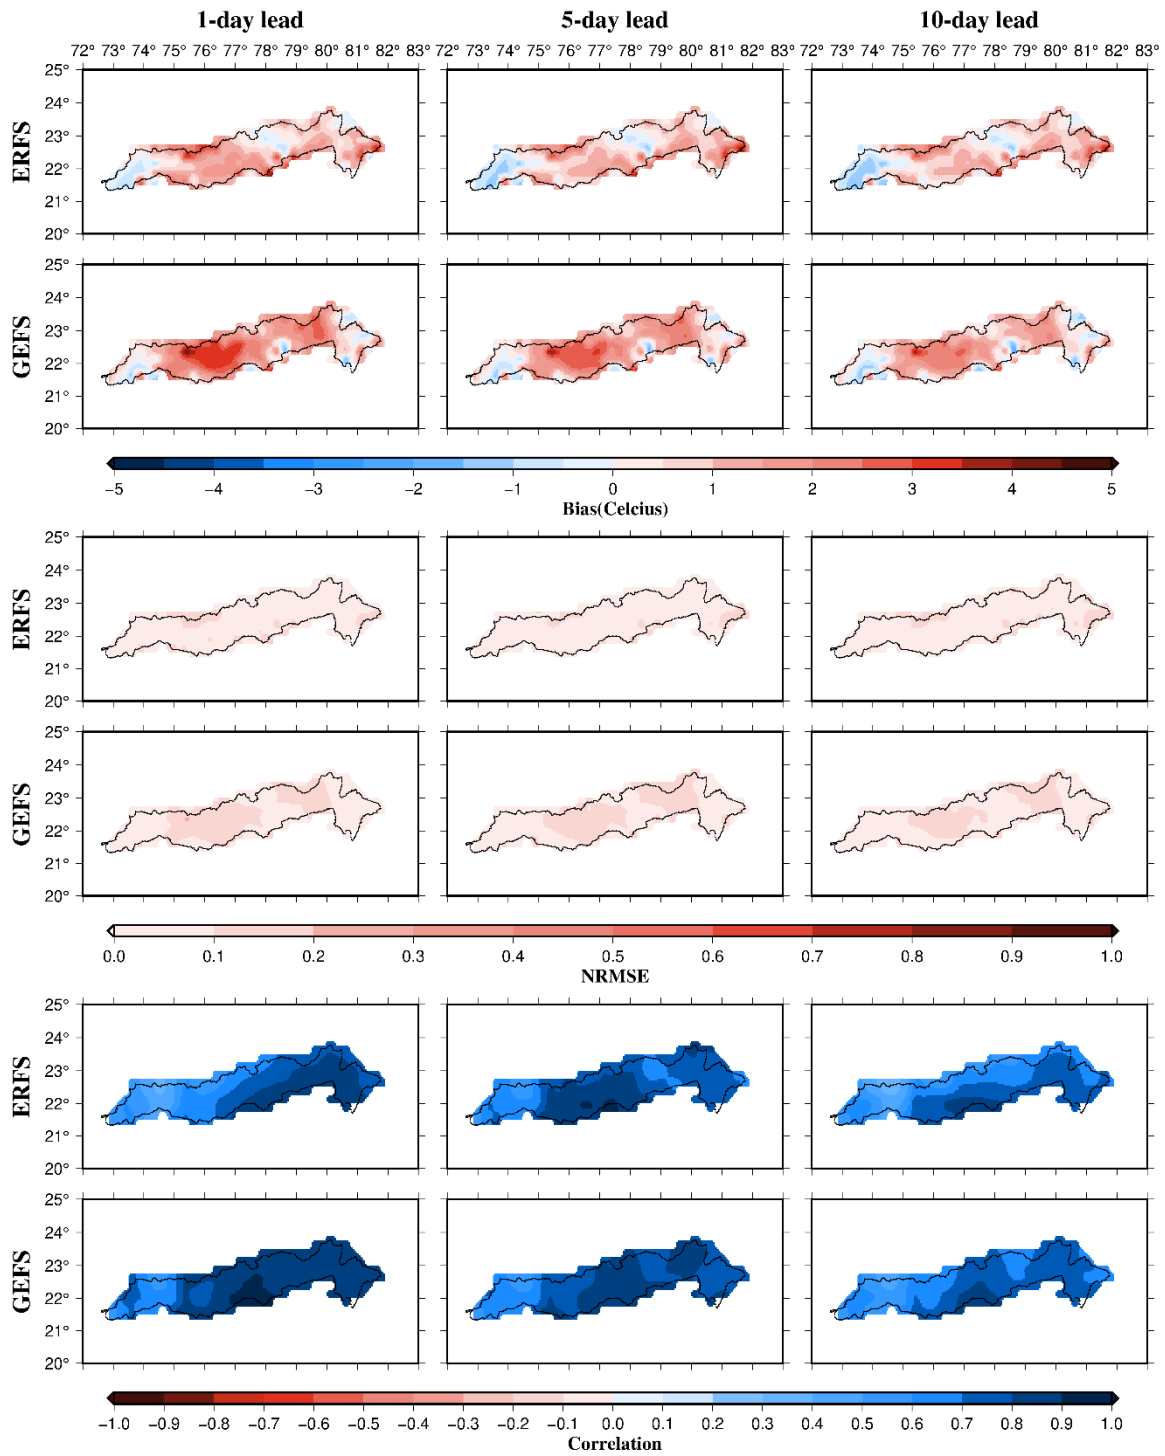

18

19 Fig. S3 - Evaluation & comparison of ERFS and GEFS meteorological forecast minimum  
 20 temperature data for summer monsoon period of 2019-2020. The median of all members'  
 21 skill at a grid is represented.

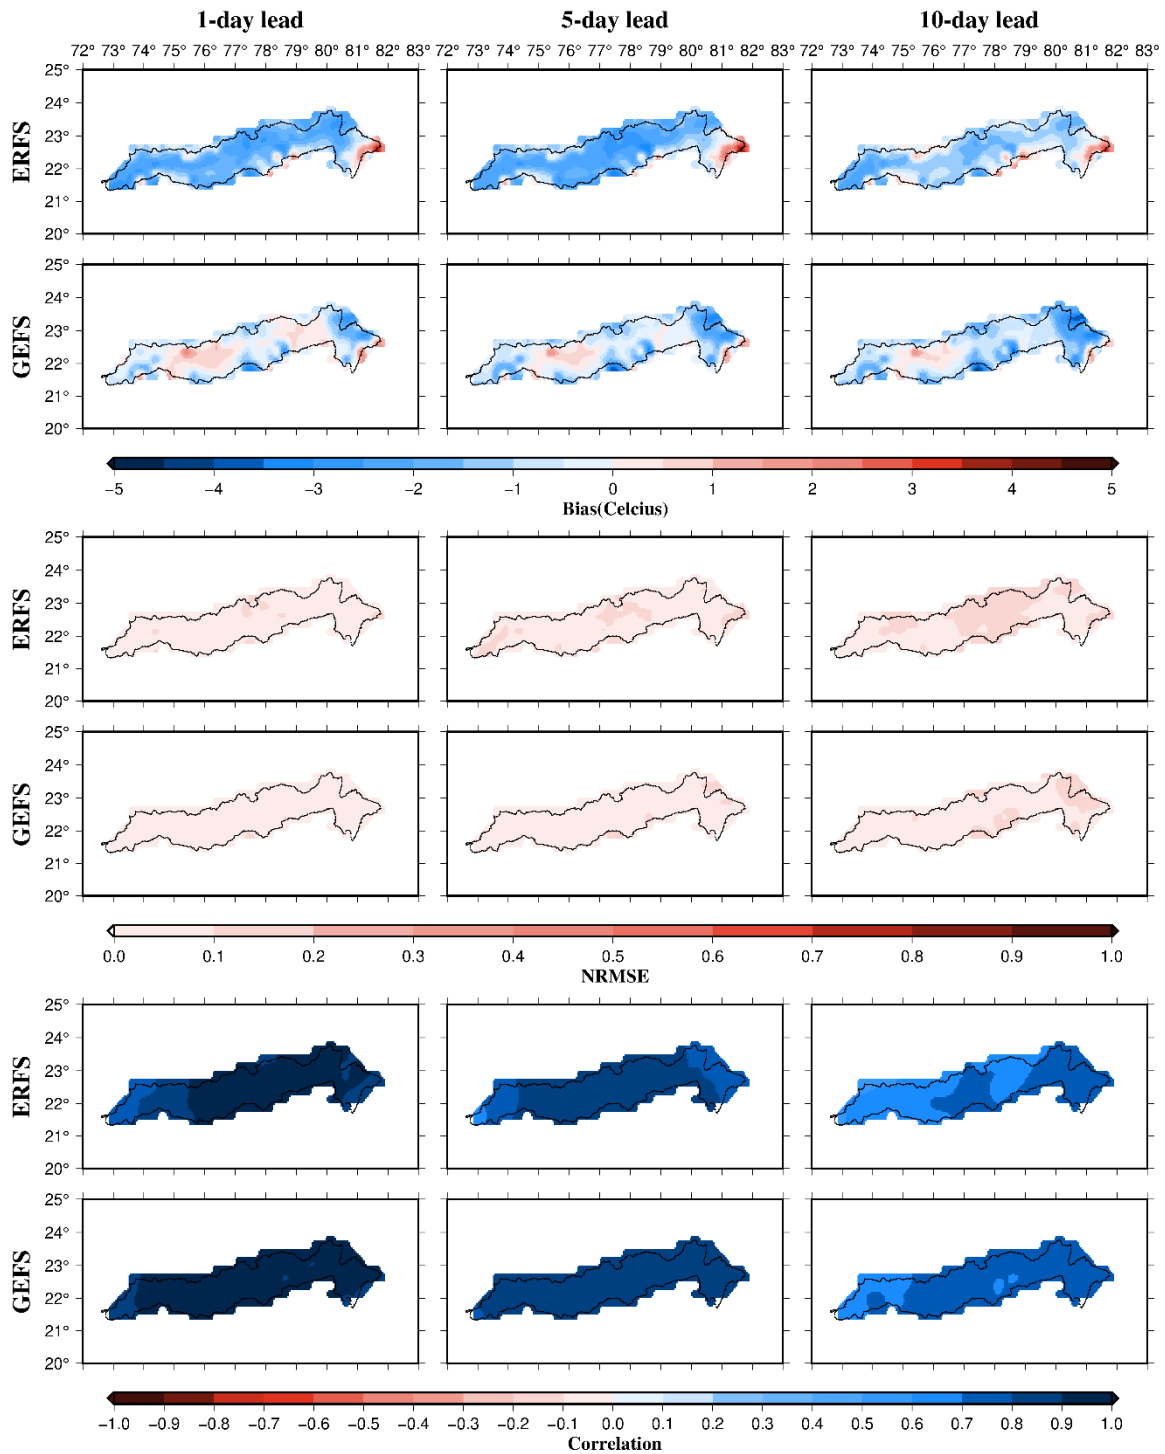

22

23 Fig. S4 - Evaluation & comparison of ERFS and GEFS meteorological forecast maximum  
 24 temperature data for summer monsoon period of 2019-2020. The median of all members'  
 25 skill at a grid is represented.

26

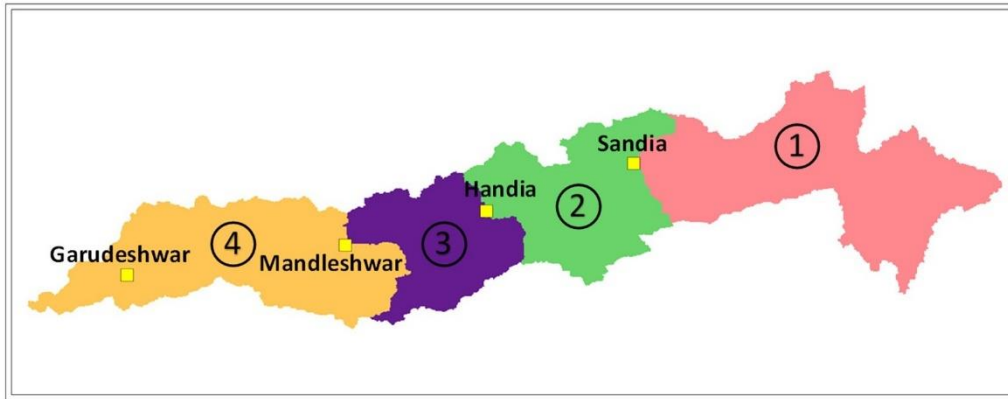

| <b>Parameter</b>             | <b>1</b> | <b>2</b> | <b>3</b> | <b>4</b> |
|------------------------------|----------|----------|----------|----------|
| <b><math>b_{inf}</math></b>  | 0.18     | 0.26     | 0.15     | 0.89     |
| <b><math>D_s</math></b>      | 0.91     | 0.94     | 0.34     | 0.29     |
| <b><math>D_{smax}</math></b> | 0.01     | 1.2      | 3.49     | 11.65    |
| <b><math>W_s</math></b>      | 0.58     | 0.74     | 0.01     | 0.01     |
| <b>d1</b>                    | 0.05     | 0.24     | 0.12     | 0.05     |
| <b>d2</b>                    | 0.46     | 0.79     | 1.31     | 0.1      |
| <b>d3</b>                    | 0.14     | 0.1      | 0.11     | 0.1      |

27

28

29 Fig. S5 – VIC-Res calibration parameters in the respective upstream region of each  
 30 station.

31



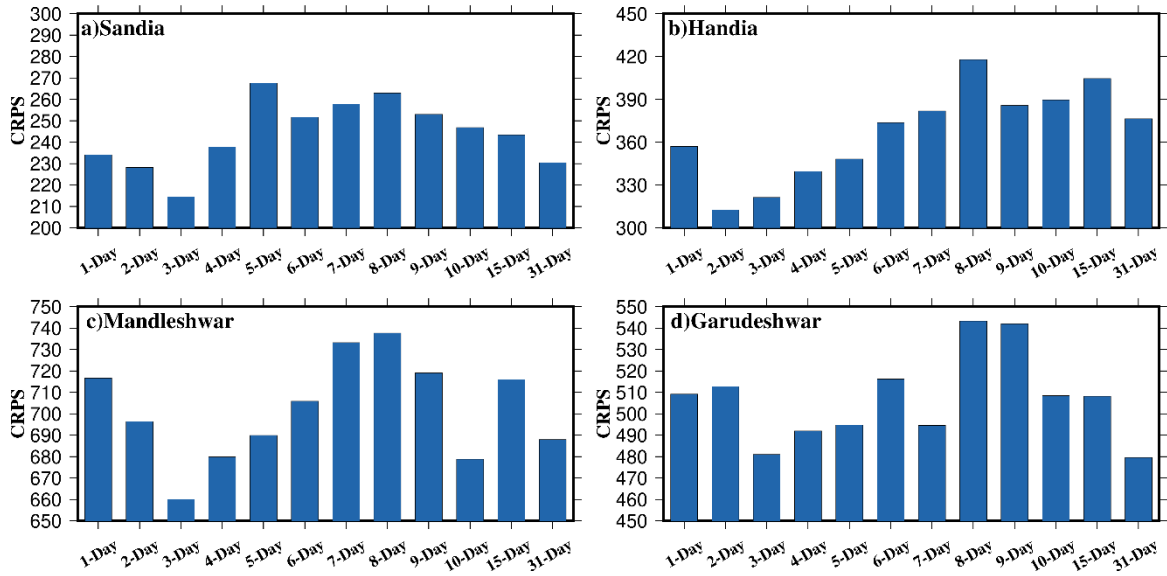

32

33 Fig. S6 – CRPS of streamflow forecast for years 2003-2018 at different leads (1-10 day,  
 34 15 day, 31 day).

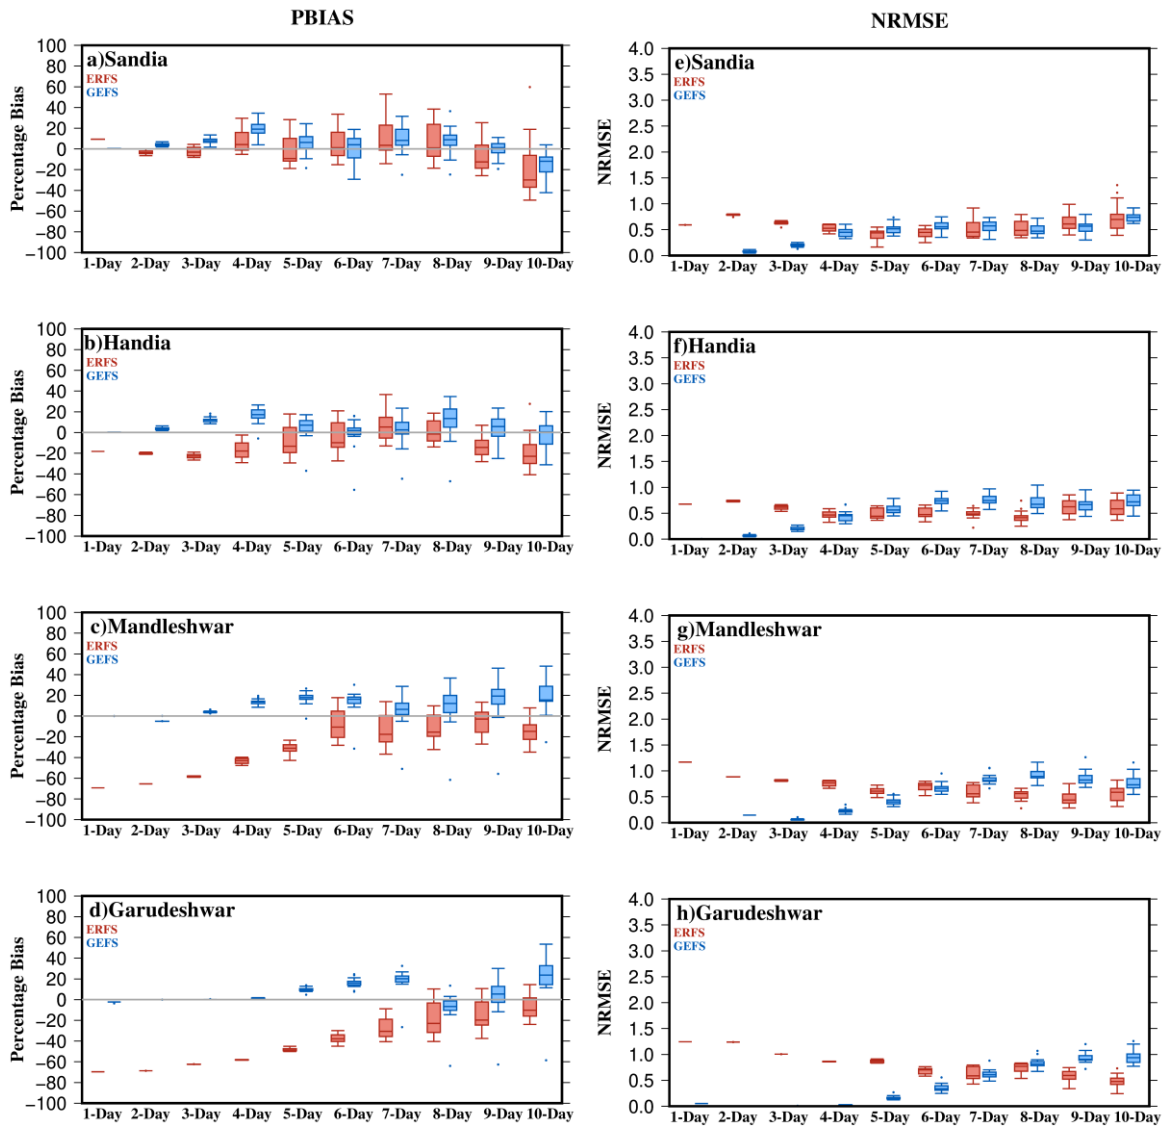

35

36 Fig. S7 - Comparison of PBIAS & NRMSE of high flows (>75th percentile) simulated  
 37 using ERFs and GEFS dataset members for 2019-2020. Due to the unavailability of  
 38 observed streamflow data, we used daily streamflow simulated by the VIC-Res model  
 39 using IMD forcing as input.

40

41

42

43

44

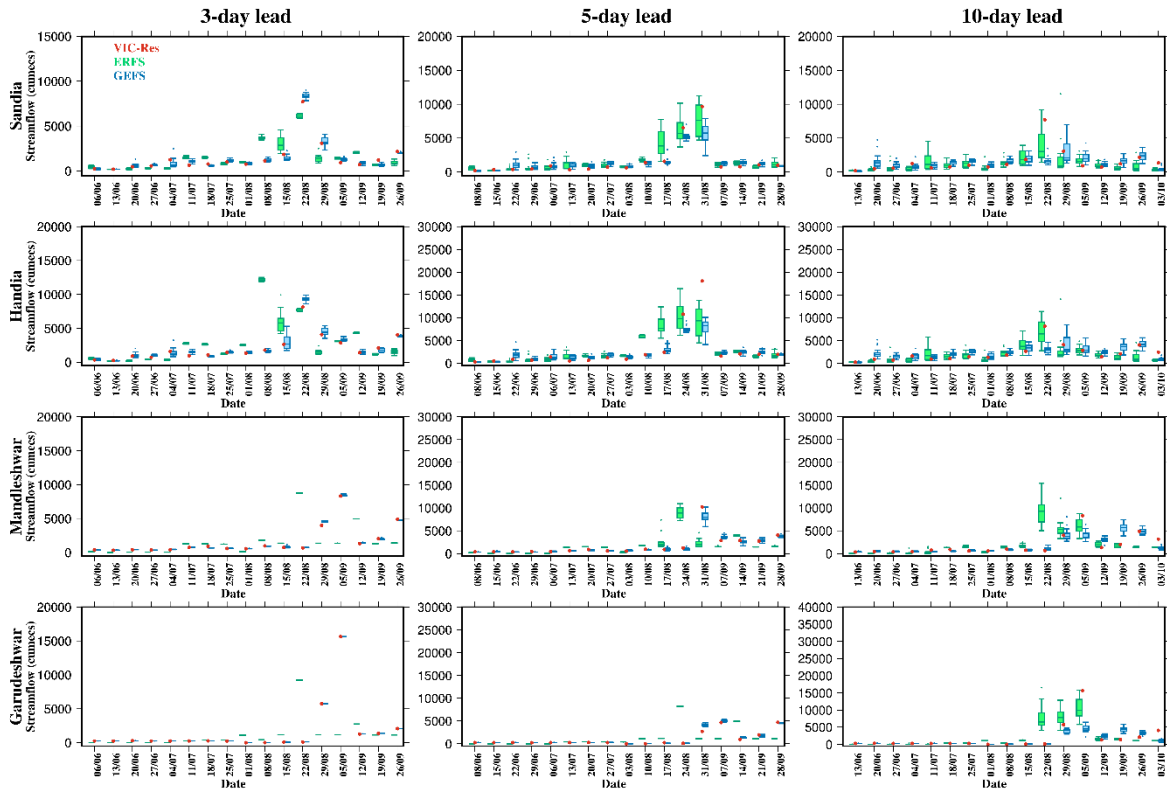

45

46 Fig. S8 – Box & whisker plot comparing streamflow simulated from ERFS and GEFS  
47 meteorological forecast against VIC-Res simulated streamflow at 3-day, 5-day and 10-day  
48 leads from weekly forecast dates of 2020 monsoon.
